# Supplementary material for: Effects of RIPC on the Metabolomical Profile during Lower Limb Digital Subtraction Angiography: A Randomized Controlled Trial
Source: MDPI journal article supplement (doi:10.3390/metabo13070856), 2023-07-18
Supplement: s1 [file s1]

**Table S3.** Significant changes in metabolite levels 24 hours after intervention between the RIPC and sham group.

|                                                | RIPC            |                 | SHAM      |                 |                    |              |                 |
|------------------------------------------------|-----------------|-----------------|-----------|-----------------|--------------------|--------------|-----------------|
|                                                | Δ Within Groups |                 |           |                 | Δ Between Groups * |              |                 |
|                                                | Median          | <i>p</i> -Value | Median    | <i>p</i> -Value | U-Statistic        | Effect Sizes | <i>p</i> -Value |
| Glutamate                                      | 7.36            | .37             | -18.01    | .004            | 874                | -0.083       | .011            |
| Taurine                                        | 7.76            | .29             | -11.98    | .029            | 911                | -0.068       | .022            |
| Asymmetric dimethyl arginine to arginine ratio | 0.000166        | .46             | -0.000582 | .011            | 898.5              | -0.073       | .017            |
| LysoPC a C24:0                                 | -0.030          | .39             | -0.205    | .001            | 929                | -0.061       | .030            |
| LysoPC a C26:1                                 | 0.011           | .79             | -0.249    | .001            | 843.5              | -0.096       | .006            |
| LysoPC a C28:0                                 | -0.039          | .69             | -0.234    | .001            | 920.5              | -0.065       | .026            |
| PC ae C30:2                                    | 0.0080          | .51             | -0.0269   | .002            | 866                | -0.087       | .009            |
| PC aa C38:1                                    | 0.161           | .14             | -0.309    | .041            | 883.5              | -0.080       | .013            |
| PC ae C44:3                                    | -0.0038         | .97             | -0.0410   | .001            | 907.5              | -0.070       | .021            |

\* - All statistical analyses reflecting changes between the groups were conducted using the Mann-Whitney U test. Only the results that are statistically significant, following the application of the Benjamini-Hochberg method for multiple comparison correction, are provided. Changes in metabolite concentrations were calculated by subtracting the baseline measurement values from the 24-hour measurement values and are given in units of micromolar ( $\mu$ M). The Hodges-Lehmann method was used to calculate the effect sizes. LysoPC- lysophosphatidylcholine; PC- phosphatidylcholine; a- acyl; aa- diacyl; ae- acyl-alkyl.
