# Supplementary material for: Effects of RIPC on the Metabolomical Profile during Lower Limb Digital Subtraction Angiography: A Randomized Controlled Trial
Source: MDPI journal article supplement (doi:10.3390/metabo13070856), 2023-07-18
Supplement: s1 [file s1]

**Table S2.** Baseline measurements of metabolites.

|                | RIPC        |         | SHAM        |         |                 |
|----------------|-------------|---------|-------------|---------|-----------------|
|                | Mean/Median | ±SD/IQR | Mean/Median | ±SD/IQR | <i>p</i> -Value |
| C0             | 51.70       | 18.19   | 47.87       | 19.08   | .19             |
| C14:1          | 0.47        | 0.44    | 0.47        | 0.25    | .86             |
| C18:1          | 0.18        | 0.08    | 0.19        | 0.06    | .80             |
| Ala            | 456.00      | 198.02  | 509.65      | 168.02  | .38             |
| Arg            | 140.00      | 47.02   | 136.26      | 50.07   | .84             |
| Asn            | 312.95      | ±95.57  | 305.48      | 120.88  | .67             |
| Asp            | 73.20       | 35.62   | 57.04       | 51.29   | .13             |
| Cit            | 49.10       | 21.68   | 45.91       | 928.64  | .67             |
| Gln            | 945.00      | 343.86  | 928.64      | 295.53  | .72             |
| Glu            | 94.25       | 73.51   | 117.33      | 60.02   | .018            |
| Gly            | 372.50      | 128.94  | 358.34      | 141.42  | .28             |
| His            | 105.50      | 30.77   | 103.44      | 32.93   | .94             |
| Ile            | 102.05      | 29.27   | 102.52      | 38.08   | .55             |
| Leu            | 205.00      | 90.41   | 210.13      | 82.86   | .35             |
| Lys            | 300.00      | 132.33  | 308.49      | 116.97  | .53             |
| Met            | 33.50       | 11.86   | 34.66       | 15.47   | .60             |
| Orn            | 124.00      | 37.29   | 124.87      | 43.06   | .68             |
| Phe            | 83.20       | 19.64   | 82.00       | 24.74   | .54             |
| Ser            | 175.96      | ±48.44  | 162.32      | 53.16   | .54             |
| Thr            | 599.00      | 269.49  | 575.96      | 246.64  | .98             |
| Trp            | 71.70       | 28.74   | 75.41       | 26.42   | .22             |
| Tyr            | 89.65       | 46.17   | 95.00       | 34.64   | .75             |
| Val            | 345.49      | ±108.05 | 350.78      | 153.94  | .24             |
| Ac-Orn         | 1.91        | 1.03    | 1.92        | 0.79    | .42             |
| ADMA           | 0.71        | 0.17    | 0.67        | 0.25    | .51             |
| Creatinine     | 122.00      | 25.66   | 122.00      | 16.11   | .88             |
| Kynurenine     | 4.16        | 2.13    | 3.97        | 1.75    | .51             |
| Putrescine     | 0.21        | 0.10    | 0.22        | 0.12    | .35             |
| Serotonin      | 0.75        | 0.62    | 0.81        | 0.51    | .56             |
| Taurine        | 117.50      | 46.96   | 118.88      | 43.05   | .68             |
| Total DMA      | 2.46        | 0.83    | 2.24        | 0.82    | .33             |
| LysoPC a C16:0 | 241.00      | 117.45  | 251.54      | 111.43  | .53             |
| LysoPC a C16:1 | 5.67        | 3.39    | 5.42        | 2.89    | .28             |
| LysoPC a C17:0 | 4.19        | 1.93    | 3.95        | 2.00    | .97             |
| LysoPC a C18:0 | 37.80       | 24.40   | 39.19       | 22.50   | .89             |
| LysoPC a C18:1 | 47.50       | 27.42   | 46.94       | 24.46   | .71             |
| LysoPC a C18:2 | 75.20       | 55.23   | 76.59       | 45.35   | .85             |

|                |        |         |        |        |     |
|----------------|--------|---------|--------|--------|-----|
| LysoPC a C20:3 | 5.36   | 3.63    | 5.24   | 2.80   | .47 |
| LysoPC a C20:4 | 17.90  | 7.94    | 16.98  | 8.67   | .72 |
| LysoPC a C24:0 | 0.72   | 0.41    | 0.78   | 0.54   | .24 |
| LysoPC a C26:0 | 1.16   | 0.69    | 1.25   | 1.16   | .36 |
| LysoPC a C26:1 | 0.80   | 0.95    | 0.99   | 0.99   | .56 |
| LysoPC a C28:0 | 0.82   | 0.57    | 0.89   | 0.80   | .20 |
| LysoPC a C28:1 | 0.89   | 0.49    | 0.96   | 0.74   | .65 |
| PC aa C24:0    | 0.47   | 0.57    | 0.51   | 0.52   | .20 |
| PC aa C26:0    | 2.50   | 1.42    | 2.77   | 1.92   | .29 |
| PC aa C28:1    | 3.02   | 1.21    | 3.07   | 1.37   | .39 |
| PC aa C30:0    | 4.65   | 2.67    | 5.08   | 2.97   | .52 |
| PC aa C30:2    | 0.62   | 0.45    | 0.60   | 0.42   | .85 |
| PC aa C32:0    | 17.15  | 8.86    | 18.71  | 9.74   | .69 |
| PC aa C32:1    | 23.20  | 17.87   | 24.56  | 20.60  | .95 |
| PC aa C32:2    | 4.77   | 3.21    | 4.42   | 3.74   | .61 |
| PC aa C32:3    | 0.52   | ±0.18   | 0.52   | 0.24   | .71 |
| PC aa C34:1    | 292.00 | 136.29  | 301.11 | 175.45 | .65 |
| PC aa C34:2    | 478.00 | ±232.15 | 491.34 | 218.98 | .39 |
| PC aa C34:3    | 17.55  | 11.32   | 17.89  | 9.31   | .99 |
| PC aa C34:4    | 1.65   | 1.15    | 1.59   | 0.86   | .65 |
| PC aa C36:0    | 2.77   | 0.87    | 2.72   | 2.06   | .44 |
| PC aa C36:1    | 54.25  | 34.38   | 53.18  | 30.97  | .87 |
| PC aa C36:2    | 254.00 | 139.06  | 256.83 | 127.66 | .86 |
| PC aa C36:3    | 129.00 | 66.59   | 132.71 | 60.38  | .86 |
| PC aa C36:4    | 208.50 | 118.07  | 207.58 | 107.79 | .81 |
| PC aa C36:5    | 37.30  | 26.30   | 47.31  | 36.99  | .25 |
| PC aa C36:6    | 1.50   | 0.70    | 1.58   | 0.97   | .87 |
| PC aa C38:0    | 2.79   | 1.22    | 2.70   | 1.59   | .97 |
| PC aa C38:1    | 1.03   | 0.71    | 1.12   | 0.93   | .15 |
| PC aa C38:3    | 48.30  | 31.89   | 49.70  | 19.89  | .89 |
| PC aa C38:4    | 117.00 | 71.10   | 108.05 | 59.60  | .44 |
| PC aa C38:5    | 55.35  | 32.15   | 57.20  | 27.42  | .92 |
| PC aa C38:6    | 91.40  | 46.97   | 93.20  | 51.87  | .45 |
| PC aa C40:2    | 0.34   | 0.13    | 0.38   | 0.24   | .35 |
| PC aa C40:3    | 0.58   | 0.24    | 0.58   | 0.33   | .96 |
| PC aa C40:4    | 3.15   | 1.58    | 3.01   | 1.25   | .55 |
| PC aa C40:5    | 3.45   | 3.45    | 8.73   | 4.16   | .59 |
| PC aa C40:6    | 32.20  | 20.62   | 32.69  | 20.09  | .92 |
| PC aa C42:0    | 0.55   | 0.22    | 0.49   | 0.27   | .56 |
| PC aa C42:1    | 0.28   | 0.09    | 0.26   | 0.12   | .15 |
| PC aa C42:2    | 0.27   | 0.12    | 0.30   | 0.13   | .23 |

|               |       |       |       |       |      |
|---------------|-------|-------|-------|-------|------|
| PC aa C42:4   | 0.16  | 0.06  | 0.15  | 0.08  | .71  |
| PC aa C42:5   | 0.35  | 0.15  | 0.36  | 0.50  | .81  |
| PC aa C42:6   | 0.49  | 0.09  | 0.52  | ±0.19 | .58  |
| PC ae C30:0   | 0.43  | 0.17  | 0.48  | 0.24  | .19  |
| PC ae C30:1   | 0.52  | 0.30  | 0.64  | 0.64  | .12  |
| PC ae C30:2   | 0.15  | 0.09  | 0.17  | 0.13  | .036 |
| PC ae C32:1   | 3.19  | 0.93  | 3.19  | 1.89  | .92  |
| PC ae C32:2   | 0.86  | 0.33  | 0.95  | 0.46  | .37  |
| PC ae C34:0   | 1.45  | 0.61  | 1.54  | 0.74  | .98  |
| PC ae C34:1   | 10.85 | 4.85  | 10.77 | 5.29  | .79  |
| PC ae C34:2   | 10.55 | 3.69  | 10.34 | 5.32  | .67  |
| PC ae C34:3   | 6.98  | ±3.08 | 6.01  | 3.20  | .39  |
| PC ae C36:0   | 1.08  | 0.47  | 1.03  | 0.63  | .85  |
| PC ae C36:1   | 7.74  | 3.79  | 8.25  | 3.67  | .69  |
| PC ae C36:2   | 14.35 | ±4.73 | 13.51 | 8.52  | .90  |
| PC ae C36:3   | 7.05  | 2.68  | 6.68  | 3.34  | .40  |
| PC ae C36:4   | 18.35 | 10.87 | 16.08 | 7.64  | .24  |
| PC ae C36:5   | 11.86 | ±4.92 | 10.58 | 4.45  | .52  |
| PC ae C38:0   | 1.97  | 1.10  | 1.97  | 0.99  | .84  |
| PC ae C38:1   | 0.52  | ±0.43 | 0.56  | 0.49  | .43  |
| PC ae C38:2   | 1.93  | 1.10  | 2.01  | 1.16  | .89  |
| PC ae C38:3   | 3.71  | 2.02  | 3.76  | 1.49  | .69  |
| PC ae C38:4   | 12.90 | 7.00  | 12.77 | 4.24  | .41  |
| PC ae C38:5   | 17.10 | 8.25  | 16.56 | 6.86  | .28  |
| PC ae C38:6   | 7.56  | 3.39  | 7.25  | 4.37  | .92  |
| PC ae C40:1   | 1.54  | ±0.78 | 1.47  | 0.56  | .70  |
| PC ae C40:2   | 1.55  | 0.57  | 1.64  | 0.77  | .47  |
| PC ae C40:3   | 0.82  | 0.20  | 0.87  | 0.36  | .47  |
| PC ae C40:4   | 2.09  | 1.03  | 1.89  | 0.92  | .14  |
| PC ae C40:5   | 3.09  | 1.25  | 3.28  | 1.27  | .81  |
| PC ae C40:6   | 4.25  | 2.16  | 4.31  | 2.25  | .79  |
| PC ae C42:1   | 0.63  | ±0.30 | 0.56  | 0.32  | .62  |
| PC ae C42:2   | 0.62  | 0.26  | 0.62  | 0.45  | .99  |
| PC ae C42:3   | 0.85  | 0.31  | 0.90  | 0.47  | .54  |
| PC ae C42:4   | 0.68  | 0.23  | 0.65  | 0.29  | .68  |
| PC ae C42:5   | 1.84  | 0.65  | 1.67  | 0.59  | .16  |
| PC ae C44:3   | 0.21  | 0.10  | 0.22  | 0.18  | .76  |
| PC ae C44:4   | 0.33  | 0.10  | 0.31  | 0.17  | .55  |
| PC ae C44:5   | 1.46  | 0.59  | 1.32  | 0.70  | .11  |
| PC ae C44:6   | 1.09  | 0.43  | 1.04  | 0.52  | .20  |
| SM (OH) C14:1 | 4.94  | 1.73  | 5.20  | 2.30  | .62  |

|                               |         |         |         |         |      |
|-------------------------------|---------|---------|---------|---------|------|
| SM (OH) C16:1                 | 2.59    | ±0.74   | 2.45    | 1.03    | .77  |
| SM (OH) C22:1                 | 9.09    | 5.06    | 9.28    | 3.72    | .71  |
| SM (OH) C22:2                 | 6.91    | 2.84    | 7.19    | 2.91    | .74  |
| SM (OH) C24:1                 | 0.84    | 0.26    | 0.83    | 0.42    | .75  |
| SM C16:0                      | 93.65   | 29.38   | 98.08   | 46.41   | .75  |
| SM C16:1                      | 12.10   | 4.17    | 12.15   | 5.41    | .87  |
| SM C18:0                      | 23.35   | 10.02   | 22.58   | 11.90   | .80  |
| SM C18:1                      | 7.65    | 3.46    | 7.21    | 4.38    | .87  |
| SM C20:2                      | 0.24    | 0.15    | 0.24    | 0.10    | .93  |
| SM C24:0                      | 14.58   | ±4.72   | 14.28   | 6.82    | .84  |
| SM C24:1                      | 38.25   | 14.97   | 42.37   | 17.74   | .32  |
| SM C26:0                      | 0.17    | ±0.07   | 0.15    | 0.10    | .55  |
| SM C26:1                      | 0.37    | ±0.15   | 0.40    | 0.20    | .39  |
| H1                            | 6467.50 | 2202.11 | 6706.54 | 2745.04 | .54  |
| AAA                           | 243.19  | 89.92   | 257.43  | 57.28   | .39  |
| ADMA / Arg                    | 0.0053  | 0.0026  | 0.0050  | 0.0024  | .95  |
| BCAA                          | 647.44  | 259.51  | 668.51  | 253.77  | .30  |
| Cit / Arg                     | 0.37    | 0.12    | 0.35    | 0.17    | .73  |
| Cit / Orn                     | 0.40    | 0.17    | 0.38    | 0.18    | .51  |
| Essential AA                  | 1658.21 | 624.28  | 1751.19 | 734.60  | .61  |
| Fisher ratio                  | 2.62    | 0.60    | 2.65    | 0.87    | .51  |
| Glucogenic AA                 | 4198    | 1054    | 4181    | 862     | .79  |
| Kynurenine / Trp              | 0.06    | 0.03    | 0.05    | 0.02    | .031 |
| Orn / Arg                     | 0.90    | 0.40    | 0.92    | 0.43    | .74  |
| Putrescine / Orn              | 0.00    | 0.00    | 0.00    | 0.00    | .62  |
| Serotonin / Trp               | 0.01    | 0.01    | 0.01    | 0.01    | .95  |
| Total SM                      | 217.63  | 78.62   | 221.83  | 81.27   | .65  |
| Total SM-non OH               | 188.70  | 63.67   | 197.37  | 70.75   | .72  |
| Total SM-OH                   | 24.08   | 10.78   | 24.52   | 10.08   | .81  |
| Total SM-OH / Total SM-non OH | 0.13    | 0.03    | 0.13    | ±0.03   | .85  |
| Tyr / Phe                     | 1.07    | 0.37    | 1.11    | ±0.19   | .86  |

Medians and IQR are given if not otherwise indicated. ± - Mean and SD are given. a - acyl; aa - diacyl; ae, acyl-alkyl.
