# Supplementary material for: Effects of RIPC on the Metabolomical Profile during Lower Limb Digital Subtraction Angiography: A Randomized Controlled Trial
Source: MDPI journal article supplement (doi:10.3390/metabo13070856), 2023-07-18
Supplement: s1 [file s1]

**Table S1.** Range, detection, and quantitation limits for measured metabolites.

|              | <b>Lowest Sample</b> | <b>Highest Sample</b> | <b>Lower Limit of Detection (μM)</b> | <b>Lower Limit of Quantification (μM)</b> |
|--------------|----------------------|-----------------------|--------------------------------------|-------------------------------------------|
| <b>C0</b>    | 24.19                | 234.32                | 10.2                                 | 10.2                                      |
| <b>C14:1</b> | 0.17                 | 2.49                  | 0.021                                | 0.021                                     |
| <b>C18:1</b> | 0.09                 | 0.56                  | 0.078                                | 0.078                                     |
| <b>Ala</b>   | 162.19               | 2182.50               | 1                                    | 20                                        |
| <b>Arg</b>   | 57.46                | 490.81                | 0.5                                  | 5                                         |
| <b>Asn</b>   | 130.26               | 1008.13               | 1.5                                  | 5                                         |
| <b>Asp</b>   | 4.15                 | 274.06                | 1.5                                  | 5                                         |
| <b>Cit</b>   | 13.38                | 221.20                | 1                                    | 5                                         |
| <b>Gln</b>   | 295.93               | 4254.90               | 1.5                                  | 20                                        |
| <b>Glu</b>   | 6.50                 | 422.65                | 2                                    | 10                                        |
| <b>Gly</b>   | 129.40               | 2291.49               | 0.5                                  | 25                                        |
| <b>His</b>   | 48.69                | 385.54                | 0.5                                  | 5                                         |
| <b>Ile</b>   | 50.21                | 397.68                | 0.5                                  | 5                                         |
| <b>Leu</b>   | 88.48                | 743.53                | 1.5                                  | 50                                        |
| <b>Lys</b>   | 143.45               | 1024.25               | 0.5                                  | 10                                        |
| <b>Met</b>   | 14.58                | 137.47                | 0.1                                  | 5                                         |
| <b>Orn</b>   | 49.99                | 595.25                | 0.5                                  | 5                                         |
| <b>Phe</b>   | 41.06                | 341.23                | 0.1                                  | 5                                         |
| <b>Ser</b>   | 66.05                | 706.22                | 1                                    | 5                                         |
| <b>Thr</b>   | 210.40               | 1865.27               | 0.5                                  | 5                                         |
| <b>Trp</b>   | 21.67                | 267.54                | 0.5                                  | 5                                         |
| <b>Tyr</b>   | 28.00                | 360.42                | 0.5                                  | 5                                         |
| <b>Val</b>   | 126.42               | 1324.78               | 0.5                                  | 10                                        |

|                       |       |        |       |       |
|-----------------------|-------|--------|-------|-------|
| <b>Ac-Orn</b>         | 0.52  | 15.19  | 0.2   | 1     |
| <b>ADMA</b>           | 0.20  | 3.25   | 0.08  | 0.25  |
| <b>Creatinine</b>     | 4.25  | 334.21 | 1     | 10    |
| <b>Kynurenine</b>     | 1.72  | 21.00  | 0.3   | 1     |
| <b>Putrescine</b>     | 0.04  | 0.97   | 0.02  | 0.1   |
| <b>Serotonin</b>      | 0.13  | 4.14   | 0.03  | 0.1   |
| <b>Taurine</b>        | 43.93 | 602.38 | 0.8   | 2.5   |
| <b>Total DMA</b>      | 1.06  | 11.89  | 0.1   | 1.25  |
| <b>LysoPC a C16:0</b> | 90.92 | 811.22 | 0.105 | 0.105 |
| <b>LysoPC a C16:1</b> | 1.94  | 20.16  | 0.059 | 0.059 |
| <b>LysoPC a C17:0</b> | 0.99  | 19.11  | 0.02  | 0.02  |
| <b>LysoPC a C18:0</b> | 12.48 | 146.48 | 0.255 | 0.255 |
| <b>LysoPC a C18:1</b> | 14.15 | 162.37 | 0.035 | 0.035 |
| <b>LysoPC a C18:2</b> | 21.84 | 322.05 | 0.105 | 0.105 |
| <b>LysoPC a C20:3</b> | 1.50  | 18.67  | 0.026 | 0.026 |
| <b>LysoPC a C20:4</b> | 5.64  | 57.16  | 0.02  | 0.02  |
| <b>LysoPC a C24:0</b> | 0.25  | 6.72   | 0.05  | 0.05  |
| <b>LysoPC a C26:0</b> | 0.29  | 8.56   | 0.07  | 0.07  |
| <b>LysoPC a C26:1</b> | 0.22  | 8.07   | 0.018 | 0.018 |
| <b>LysoPC a C28:0</b> | 0.17  | 10.62  | 0.127 | 0.127 |
| <b>LysoPC a C28:1</b> | 0.28  | 5.45   | 0.009 | 0.009 |
| <b>PC aa C24:0</b>    | 0.13  | 5.45   | 0.043 | 0.043 |
| <b>PC aa C26:0</b>    | 0.90  | 22.70  | 0.838 | 0.838 |
| <b>PC aa C28:1</b>    | 1.41  | 13.31  | 0.081 | 0.081 |
| <b>PC aa C30:0</b>    | 1.39  | 35.61  | 0.128 | 0.128 |
| <b>PC aa C30:2</b>    | 0.05  | 2.56   | 0     | 0     |

|             |        |         |       |       |
|-------------|--------|---------|-------|-------|
| PC aa C32:0 | 6.25   | 112.57  | 0.02  | 0.02  |
| PC aa C32:1 | 4.90   | 266.08  | 0.005 | 0.005 |
| PC aa C32:2 | 0.18   | 25.96   | 0.013 | 0.013 |
| PC aa C32:3 | 0.18   | 2.83    | 0.008 | 0.008 |
| PC aa C34:1 | 105.91 | 2299.28 | 0.033 | 0.033 |
| PC aa C34:2 | 175.79 | 2557.55 | 0.054 | 0.054 |
| PC aa C34:3 | 4.40   | 138.82  | 0.012 | 0.012 |
| PC aa C34:4 | 0.48   | 11.81   | 0.014 | 0.014 |
| PC aa C36:0 | 0.78   | 15.32   | 0.317 | 0.317 |
| PC aa C36:1 | 13.58  | 441.70  | 0.014 | 0.014 |
| PC aa C36:2 | 77.26  | 1521.85 | 0.016 | 0.016 |
| PC aa C36:3 | 40.90  | 761.52  | 0.011 | 0.011 |
| PC aa C36:4 | 72.84  | 995.09  | 0.01  | 0.01  |
| PC aa C36:5 | 11.76  | 257.12  | 0.003 | 0.003 |
| PC aa C36:6 | 0.30   | 7.30    | 0.003 | 0.003 |
| PC aa C38:0 | 1.02   | 13.75   | 0.005 | 0.005 |
| PC aa C38:1 | 0.10   | 12.72   | 0.008 | 0.008 |
| PC aa C38:3 | 13.13  | 267.29  | 0.009 | 0.009 |
| PC aa C38:4 | 29.80  | 578.75  | 0.01  | 0.01  |
| PC aa C38:5 | 19.75  | 340.12  | 0.011 | 0.011 |
| PC aa C38:6 | 30.19  | 504.60  | 0.393 | 0.393 |
| PC aa C40:2 | 0.07   | 3.06    | 0.005 | 0.005 |
| PC aa C40:3 | 0.20   | 4.58    | 0.002 | 0.002 |
| PC aa C40:4 | 0.79   | 23.62   | 0.011 | 0.011 |
| PC aa C40:5 | 2.52   | 62.68   | 0.002 | 0.002 |
| PC aa C40:6 | 10.15  | 235.49  | 0.281 | 0.281 |

|             |      |        |       |       |
|-------------|------|--------|-------|-------|
| PC aa C42:0 | 0.19 | 2.24   | 0.031 | 0.031 |
| PC aa C42:1 | 0.08 | 1.59   | 0.007 | 0.007 |
| PC aa C42:2 | 0.09 | 1.80   | 0.056 | 0.056 |
| PC aa C42:4 | 0.05 | 0.88   | 0.006 | 0.006 |
| PC aa C42:5 | 0.07 | 2.76   | 0.001 | 0.001 |
| PC aa C42:6 | 0.16 | 3.19   | 0.278 | 0.278 |
| PC ae C30:0 | 0.16 | 3.54   | 0.134 | 0.134 |
| PC ae C30:1 | 0.08 | 4.81   | 0.018 | 0.018 |
| PC ae C30:2 | 0.05 | 1.26   | 0.006 | 0.006 |
| PC ae C32:1 | 1.15 | 22.93  | 0.005 | 0.005 |
| PC ae C32:2 | 0.32 | 4.55   | 0.016 | 0.016 |
| PC ae C34:0 | 0.43 | 13.58  | 0.025 | 0.025 |
| PC ae C34:1 | 3.68 | 84.57  | 0.014 | 0.014 |
| PC ae C34:2 | 3.77 | 64.81  | 0.008 | 0.008 |
| PC ae C34:3 | 2.11 | 33.49  | 0.027 | 0.027 |
| PC ae C36:0 | 0.35 | 5.96   | 0.139 | 0.139 |
| PC ae C36:1 | 2.95 | 58.63  | 0.121 | 0.121 |
| PC ae C36:2 | 4.79 | 93.16  | 0.028 | 0.028 |
| PC ae C36:3 | 2.45 | 46.64  | 0.004 | 0.004 |
| PC ae C36:4 | 8.33 | 102.99 | 0.016 | 0.016 |
| PC ae C36:5 | 4.32 | 49.25  | 0.005 | 0.005 |
| PC ae C38:0 | 0.50 | 9.80   | 0.103 | 0.103 |
| PC ae C38:1 | 0.03 | 4.03   | 0.014 | 0.014 |
| PC ae C38:2 | 0.58 | 16.63  | 0.006 | 0.006 |
| PC ae C38:3 | 1.35 | 23.19  | 0.012 | 0.012 |
| PC ae C38:4 | 5.58 | 81.41  | 0.016 | 0.016 |

|               |       |        |       |       |
|---------------|-------|--------|-------|-------|
| PC ae C38:5   | 6.70  | 85.31  | 0.023 | 0.023 |
| PC ae C38:6   | 2.80  | 38.27  | 0.001 | 0.001 |
| PC ae C40:1   | 0.42  | 9.57   | 0.008 | 0.008 |
| PC ae C40:2   | 0.62  | 7.93   | 0.01  | 0.01  |
| PC ae C40:3   | 0.30  | 4.53   | 0.008 | 0.008 |
| PC ae C40:4   | 0.72  | 12.88  | 0.049 | 0.049 |
| PC ae C40:5   | 1.01  | 16.55  | 0.003 | 0.003 |
| PC ae C40:6   | 1.55  | 28.21  | 0.013 | 0.013 |
| PC ae C42:1   | 0.16  | 3.67   | 0.094 | 0.094 |
| PC ae C42:2   | 0.20  | 3.54   | 0.006 | 0.006 |
| PC ae C42:3   | 0.28  | 5.10   | 0.011 | 0.011 |
| PC ae C42:4   | 0.18  | 3.57   | 0.3   | 0.3   |
| PC ae C42:5   | 0.62  | 8.73   | 0.623 | 0.623 |
| PC ae C44:3   | 0.06  | 1.48   | 0.025 | 0.025 |
| PC ae C44:4   | 0.08  | 1.78   | 0.075 | 0.075 |
| PC ae C44:5   | 0.50  | 6.91   | 0.065 | 0.065 |
| PC ae C44:6   | 0.34  | 5.07   | 0.035 | 0.035 |
| SM (OH) C14:1 | 1.90  | 20.95  | 0.012 | 0.012 |
| SM (OH) C16:1 | 0.89  | 11.60  | 0.008 | 0.008 |
| SM (OH) C22:1 | 3.68  | 35.91  | 0.004 | 0.004 |
| SM (OH) C22:2 | 2.88  | 28.31  | 0.01  | 0.01  |
| SM (OH) C24:1 | 0.30  | 3.48   | 0.002 | 0.002 |
| SM C16:0      | 37.68 | 437.68 | 0.03  | 0.03  |
| SM C16:1      | 4.33  | 52.46  | 0.015 | 0.015 |
| SM C18:0      | 7.74  | 90.27  | 0.008 | 0.008 |
| SM C18:1      | 2.57  | 31.21  | 0.01  | 0.01  |

|                 |         |          |       |       |
|-----------------|---------|----------|-------|-------|
| <b>SM C20:2</b> | 0.07    | 0.71     | 0.003 | 0.003 |
| <b>SM C24:0</b> | 4.38    | 61.68    | 0.003 | 0.003 |
| <b>SM C24:1</b> | 13.43   | 182.41   | 0.001 | 0.001 |
| <b>SM C26:0</b> | 0.02    | 0.83     | 0.004 | 0.004 |
| <b>SM C26:1</b> | 0.08    | 2.57     | 0.004 | 0.004 |
| <b>H1</b>       | 3623.85 | 26918.34 | 29.9  | 200   |
