# Supplementary material for: Effects of RIPC on the Metabolomical Profile during Lower Limb Digital Subtraction Angiography: A Randomized Controlled Trial
Source: MDPI journal article supplement (doi:10.3390/metabo13070856), 2023-07-18
Supplement: s1 [file s1]

**Table S4.** Correlations of significant haemodynamic, biochemical and metabolic changes.

|               |                | Glutamate |         | Taurine |        | ADMA to Arginine Ratio |        | LysoPC a C24:0 |        | LysoPC a C28:0 |        | LysoPC a C26:1 |        | PC aa C38:1 |        | PC ae C30:2 |        | PC ae C44:3 |        |
|---------------|----------------|-----------|---------|---------|--------|------------------------|--------|----------------|--------|----------------|--------|----------------|--------|-------------|--------|-------------|--------|-------------|--------|
|               |                | RIPC      | SHAM    | RIPC    | SHAM   | RIPC                   | SHAM   | RIPC           | SHAM   | RIPC           | SHAM   | RIPC           | SHAM   | RIPC        | SHAM   | RIPC        | SHAM   | RIPC        | SHAM   |
| AIx           | Spearman's rho | -0.006    | -0.204  | 0.151   | -0.267 | 0.069                  | -0.038 | 0.060          | -0.135 | 0.044          | -0.088 | 0.115          | -0.049 | -0.056      | 0.060  | -0.012      | -0.040 | 0.193       | 0.070  |
|               | p-value        | .967      | .140    | .315    | .051   | .646                   | .786   | .692           | .332   | .771           | .528   | .449           | .725   | .710        | .669   | .935        | .773   | .199        | .617   |
| AIx@75%       | Spearman's rho | -0.038    | -0.282* | 0.233   | -0.247 | 0.108                  | -0.042 | 0.046          | -0.235 | 0.035          | -0.194 | 0.097          | -0.174 | -0.007      | -0.037 | 0.079       | -0.098 | 0.132       | -0.029 |
|               | p-value        | .802      | .039    | .119    | .071   | .475                   | .764   | .761           | .087   | .819           | .159   | .522           | .207   | .966        | .789   | .601        | .483   | .383        | .836   |
| MAP           | Spearman's rho | -0.183    | -0.113  | 0.036   | 0.020  | -0.132                 | -0.065 | 0.361*         | -0.081 | 0.290          | -0.259 | 0.306*         | -0.182 | 0.246       | 0.052  | 0.049       | -0.224 | -0.002      | 0.073  |
|               | p-value        | .225      | .414    | .814    | .888   | .381                   | .642   | .014           | .561   | .051           | .058   | .039           | .189   | .100        | .709   | .748        | .104   | .987        | .600   |
| PWV           | Spearman's rho | -0.013    | -0.090  | -0.108  | -0.011 | 0.009                  | 0.007  | -0.138         | 0.069  | -0.159         | -0.074 | -0.072         | -0.035 | 0.058       | 0.122  | -0.149      | -0.013 | -0.063      | 0.068  |
|               | p-value        | .929      | .519    | .474    | .935   | .952                   | .959   | .362           | .619   | .291           | .595   | .634           | .800   | .704        | .378   | .323        | .925   | .676        | .625   |
| PSBP          | Spearman's rho | -0.151    | 0.056   | 0.025   | 0.052  | -0.043                 | -0.044 | 0.355*         | 0.027  | 0.345*         | -0.162 | 0.402**        | -0.101 | 0.228       | 0.010  | 0.059       | -0.122 | 0.040       | 0.119  |
|               | p-value        | .317      | .687    | .870    | .709   | .779                   | .751   | .015           | .844   | .019           | .242   | .006           | .469   | .128        | .942   | .698        | .380   | .792        | .392   |
| CSBP          | Spearman's rho | -0.136    | -0.039  | 0.043   | 0.026  | -0.066                 | -0.042 | 0.357*         | -0.024 | 0.333*         | -0.188 | 0.405**        | -0.119 | 0.186       | 0.068  | 0.054       | -0.137 | 0.100       | 0.131  |
|               | p-value        | .369      | .777    | .777    | .853   | .665                   | .762   | .015           | .861   | .024           | .173   | .005           | .392   | .216        | .625   | .720        | .322   | .509        | 0.344  |
| Adiponectin   | Spearman's rho | -0.338*   | 0.216   | -0.137  | -0.144 | -0.316*                | -0.209 | 0.121          | 0.135  | 0.051          | 0.117  | 0.089          | 0.145  | -0.179      | -0.065 | 0.220       | 0.094  | -0.239      | -0.062 |
|               | p-value        | .021      | .117    | .365    | .297   | .032                   | .129   | .424           | .331   | .735           | .399   | .557           | .296   | .233        | .639   | .142        | .498   | .110        | .657   |
| Hs-Troponin-T | Spearman's rho | -0.020    | 0.020   | 0.197   | 0.100  | -0.205                 | 0.074  | 0.165          | -0.001 | 0.193          | -0.070 | 0.107          | -0.073 | 0.242       | 0.011  | 0.178       | 0.092  | 0.100       | -0.131 |
|               | p-value        | .896      | .883    | .189    | .470   | .173                   | .594   | .274           | .993   | .198           | .614   | .480           | .598   | .105        | .937   | .236        | .508   | .509        | .346   |
| CK-MB         | Spearman's rho | -0.201    | -0.107  | -0.152  | 0.112  | -0.100                 | -0.026 | 0.034          | -0.186 | -0.138         | -0.235 | -0.115         | -0.126 | -0.169      | -0.090 | -0.099      | -0.072 | -0.193      | -0.039 |
|               | p-value        | .181      | .442    | .313    | .422   | .509                   | .849   | .825           | .178   | .362           | .087   | .448           | .364   | .262        | .519   | .514        | .605   | .199        | .777   |
| NT-proBNP     | Spearman's rho | -0.089    | -0.080  | -0.085  | -0.042 | -0.067                 | -0.171 | 0.018          | -0.003 | -0.038         | -0.085 | 0.033          | -0.014 | 0.092       | -0.155 | -0.028      | 0.022  | -0.056      | 0.123  |
|               | p-value        | .559      | .564    | .575    | .764   | .657                   | .217   | .908           | .983   | .803           | .543   | .828           | .919   | .542        | .263   | .852        | .872   | .711        | .374   |
| Creatinine    | Spearman's rho | -.303*    | -0.213  | -0.191  | -0.168 | 0.038                  | -0.075 | -0.017         | 0.080  | -0.035         | 0.202  | -0.117         | 0.175  | -0.193      | 0.180  | -0.154      | 0.047  | 0.002       | -0.107 |
|               | p-value        | .041      | .122    | .203    | .225   | .804                   | .589   | .912           | .564   | .820           | .143   | .439           | .206   | .200        | .194   | .306        | .735   | .987        | .442   |
| eGFR          | Spearman's rho | 0.261     | 0.199   | 0.224   | 0.155  | 0.045                  | 0.076  | 0.002          | -0.117 | -0.001         | -0.245 | 0.083          | -0.205 | 0.114       | -0.194 | 0.081       | -0.090 | -0.028      | 0.076  |
|               | p-value        | .080      | .150    | .135    | .264   | .768                   | .586   | .989           | .398   | .996           | .074   | .582           | .136   | .449        | .160   | .592        | .516   | .852        | .583   |
| Urea          | Spearman's rho | -0.056    | -0.034  | 0.069   | -0.102 | 0.088                  | 0.232  | 0.286          | -0.130 | 0.228          | -0.063 | 0.162          | -0.078 | 0.084       | 0.196  | 0.201       | 0.008  | 0.119       | -0.122 |
|               | p-value        | .713      | .809    | .650    | .464   | .563                   | .091   | .054           | .347   | .128           | .650   | .283           | .575   | .580        | .156   | .181        | .952   | .432        | .379   |

Correlation coefficients of Spearman's rho are represented. AIx- augmentation index; AIx@75%- heart rate corrected augmentation index; MAP-mean arterial pressure; PWV- pulse wave velocity; PSBP- peripheral systolic blood pressure; CSBP- central systolic blood pressure; hs-Troponin-T – high sensitivity troponin T; CK-MB – creatinine kinase MB isoenzyme; NT-proBNP – N-terminal pro b-type natriuretic peptide; eGFR- estimated glomerular filtration rate; ADMA – asymmetric dimethyl arginine; LysoPC- lysophosphatidylcholine; PC- phosphatidylcholine; a- acyl; aa- diacyl; ae- acyl-alkyl; \*\* - correlation is significant at the .01 level (2-tailed); \* - correlation is significant at the .05 level (2-tailed).
