# Supplementary material for: Effects of RIPC on the Metabolomical Profile during Lower Limb Digital Subtraction Angiography: A Randomized Controlled Trial
Source: Metabolites. 2023 Jul 18;13(7):856. doi: 10.3390/metabo13070856 (PMC10384110; doi:10.3390/metabo13070856)
Supplement: Supplementary file 1 [file metabolites-13-00856-s001.zip]

Archive with 4 entries (4 files):
- Table S1 - Range, detection, and quantitation limits for measured metabolites.pdf
- Table S2 - Baseline measurements of metabolites.pdf
- Table S3 - Significant changes in metabolite levels 24 hours after intervention between the RIPC and sham group.pdf
- Table S4 - Correlations of significant hemodynamic, biochemical and metabolic changes.pdf
